# Supplementary material for: Theoretical Study on the Gas Phase and Gas–Liquid Interface Reaction Mechanism of Criegee Intermediates with Glycolic Acid Sulfate
Source: MDPI journal article supplement (doi:10.3390/ijms24043355), 2023-02-08
Supplement: s1 [file s1]

Supplementary Material for

**Theoretical Study on the Gas Phase and Gas-Liquid  
Interface Reaction Mechanism of Criegee Intermediates  
with Glycolic Acid Sulfate**

Lei Li, Qingzhu Zhang<sup>\*</sup>, Yuanyuan Wei, Qiao Wang, Wenxing Wang

Environment Research Institute, Shandong University,

Qingdao 266237, P. R. China

**Keywords:** Criegee intermediates, Glycolic acid sulfate, Gas-phase reaction, Aqueous-surface reaction, Proton transfer

---

<sup>\*</sup>Corresponding authors. E-mail: [zqz@sdu.edu.cn](mailto:zqz@sdu.edu.cn)

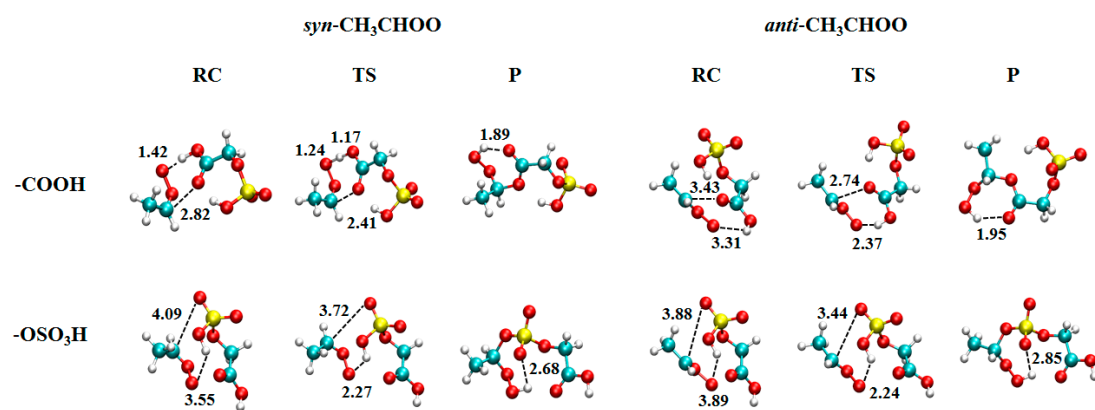

**Figure. S1.** The configurations of the direct reaction stages (reaction complex, transition state, product).

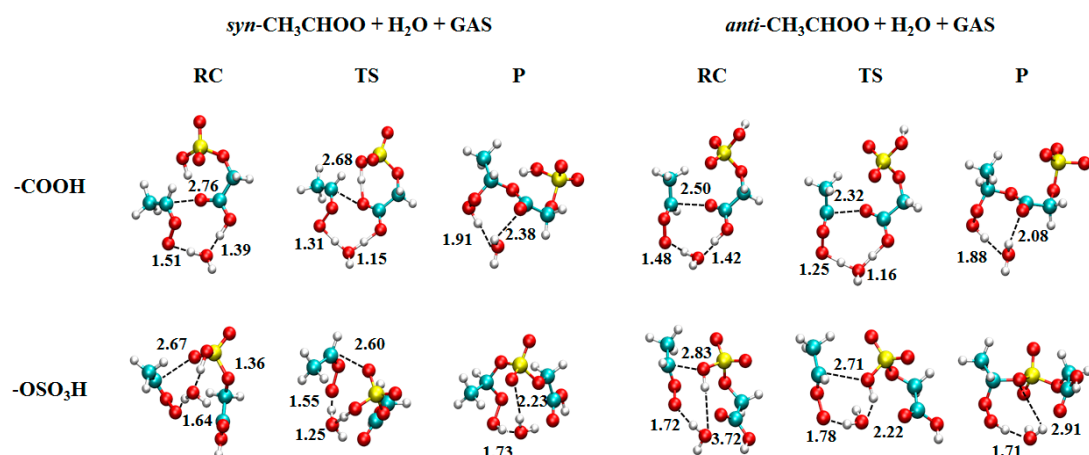

**Figure. S2.** The configurations of the direct and water-mediated reaction stages (reaction complex, transition state, product).
